# Supplementary material
Source: Royal Society of Chemistry journal article supplement (doi:10.1039/d6im00088f)

# Supplementary Information (SI) for Industrial Chemistry & Materials.

This journal is © Institute of Process Engineering of CAS 2026

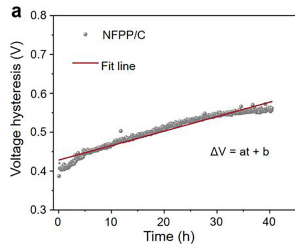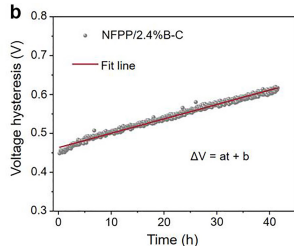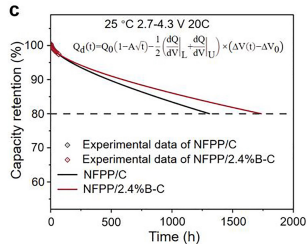

Supplement: d6im00088f3.pdf [file d6im00088f3.pdf]
