# Supplementary material
Source: Royal Society of Chemistry journal article supplement (doi:10.1039/d6im00088f)

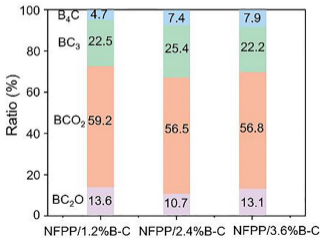

Supplement: d6im00088f1.pdf [file d6im00088f1.pdf]

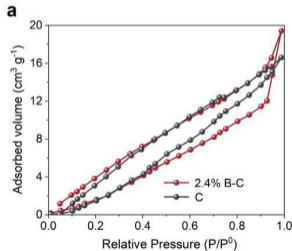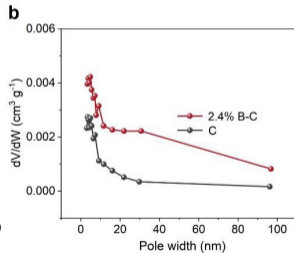

Supplement: d6im00088f10.pdf [file d6im00088f10.pdf]

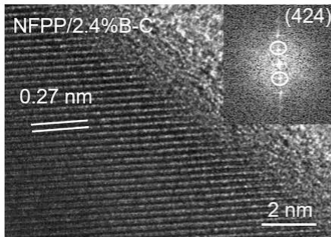

Supplement: d6im00088f11.pdf [file d6im00088f11.pdf]

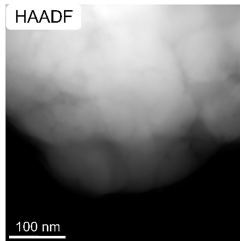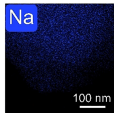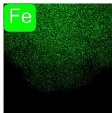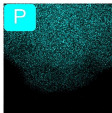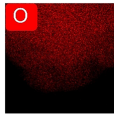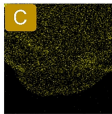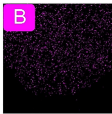

Supplement: d6im00088f12.pdf [file d6im00088f12.pdf]

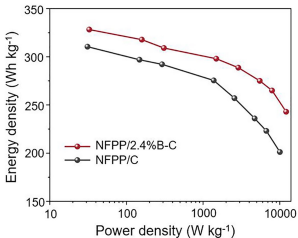

Supplement: d6im00088f13.pdf [file d6im00088f13.pdf]

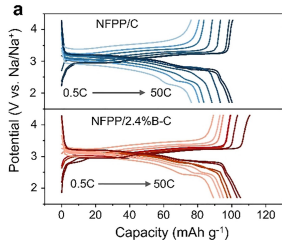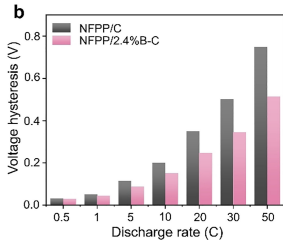

Supplement: d6im00088f2.pdf [file d6im00088f2.pdf]

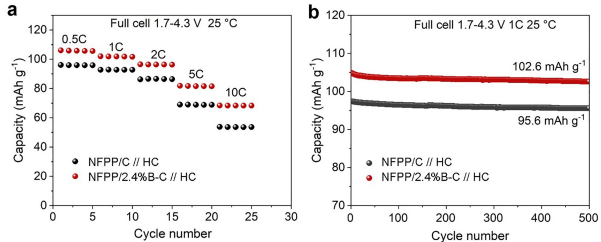

Supplement: d6im00088f4.pdf [file d6im00088f4.pdf]

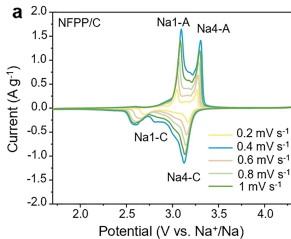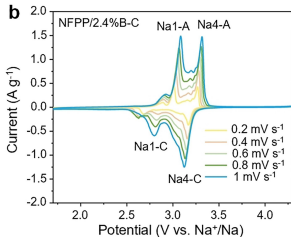

Supplement: d6im00088f5.pdf [file d6im00088f5.pdf]

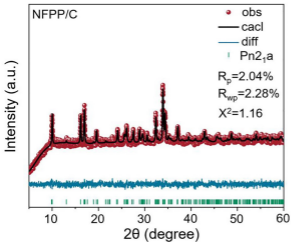

Supplement: d6im00088f6.pdf [file d6im00088f6.pdf]

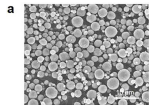

**NFPP/C**

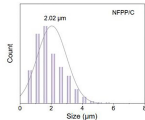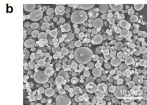

**NFPP/1.2%B-C**

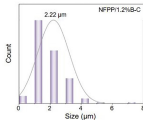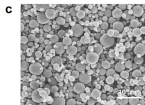

**NFPP/2.4%B-C**

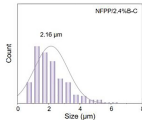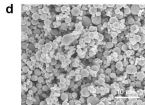

**NFPP/3.6%B-C**

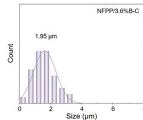

Supplement: d6im00088f7.pdf [file d6im00088f7.pdf]

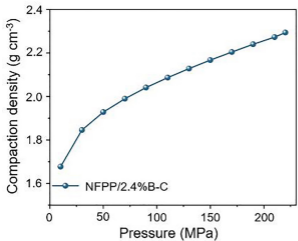

Supplement: d6im00088f8.pdf [file d6im00088f8.pdf]

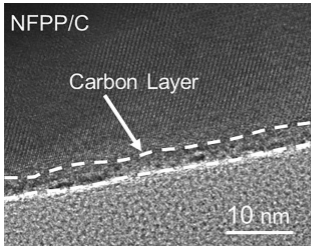

Supplement: d6im00088f9.pdf [file d6im00088f9.pdf]
